# Supplementary material for: Human Liver Cells Expressing Albumin and Mesenchymal Characteristics Give Rise to Insulin-Producing Cells
Source: Hindawi journal article supplement (doi:10.1155/2011/252387), 2011-01-01
Supplement: f1 [file 252387.f1.pdf]

Supplement M1:

The antibodies used in this study are conjugated monoclonal antibodies against CD105 (1:100, *Fitzgerald Industries International*, Concord, MA), and CD90 (1:100, *BD PharMingen*, SanDiego, CA) and unconjugated monoclonal antibodies; rabbit anti human albumin (1:200 *Dako*, *Glostrup*, *Denmark*), guinea-pig anti human insulin (1:100 *Dako*, *Glostrup*, *Denmark*), rabbit anti GFP (1:100 *MBL*, *Woburn*, *MA*) and mouse anti GFP (1:100 *Santa Cruz Biotechnology*). Secondary antibodies were, anti-guinea pig IgG indodicarbocyanine (cy5), anti-guinea pig IgG aminomethylcoumarin (AMCA), anti-rabbit IgG Cyanine (cy2), anti-rabbit IgG indocarboyanine (cy3), anti-mouse IgG Cyanine (cy2) conjugated antibodies (all 1:250, from *Jackson ImmunoResearch*, PA)

Supplement M2

Primers list,

Annealing temperate of all primers 60<sup>0</sup>c

|         |           | F Primer                 | R Primer                |
|---------|-----------|--------------------------|-------------------------|
| ADH1b   | NM_000668 | GTCGGCTTGACACCATGATG     | ACCCCTACGATGACGCTTGT    |
| AFP     | NM_001134 | GTCCCTCCTGCATTCTCTGATG   | TGGCCTTGGCAGCATTTTC     |
| ALB     | NM_000477 | AGGGTAAAGAGTCGTTATGCT    | CAATCTCAACCCACTGTCAGCTA |
| CD90    | NM_006288 | TCCATCAGGTCCCAATCC       | CCCACCCCTCATCAGGAGTT    |
| CEBPβ   | NM_005194 | GGAGCCCGTCGGTAATTTTAA    | TCTGCATGTGCGGTTGGTT     |
| CK18    | NM_199187 | CAGAGATCGAGGCTCTCAAGGA   | GGCATCTACCTCCACGGTCAA   |
| CK19    | NM_002276 | TGCGGGACAAGATTCTTGGT     | GCAGGACAATCCTGGAGTTCTC  |
| DES     | NM_001927 | GCGACAACCTGCTCGACGACCT   | GCTCGGAAGGCAGCCAAATTGT  |
| E-CAD   | NM_004360 | TGCCCCCAATACCCAGCGT      | ACGGTGGCTGTGGAGGTGGT    |
| GCG     | NM_002054 | CCAAGATTTTGTGCAGTGGT     | GGTAAAGGTCCCTTCAGCAT    |
| GCK     | NM_000162 | CATCTCTGAGTGCATCTCCGACT  | TCGCAGTGATGGTCTTCGTAGTA |
| GFAP    | NM_002055 | CGAGAAACCAGCCTGGACACCAA  | TCCATCCCGCATCTCCACGGT   |
| GLUL    | NM_002065 | GTTTGGCATGGAGCAGGAGTA    | CCCATGCTGATTCCTTCACAA   |
| GLUT2   | NM_000340 | TCCAGCTACCGACAGCCTATT    | CCAGCCGTCTGAAA AATGCT   |
| INS     | NM_000207 | GCAGCCTTTGTGAACCAACA     | CGGGTCTGGGTGTGTAGAAGAAG |
| N-CAD   | NM_001792 | CGATCTGCAGCCCCACACCC     | TGGCCCCAGTCGTTACGGT     |
| PC2     | NM_002594 | GAGAAGACGCAGCCTACACC     | CTGCAAAGCCATCTTTACCC    |
| SMA     | MN_001613 | GGAGAGCAGGCCAAGGGGCTATAT | AGGATTCCTGACAGTGTGGCTG  |
| SST     | NM_001048 | ATGATGCCCTGGAACCTGAAG    | GCCGGGTTTGAGTTAGCAGAT   |
| β-actin | NM_001101 | TTGCACAGGATGCAGAA        | CTCAGGAGGAGCAATGATCT    |
